# Supplementary material for: Global Analysis of UDP Glucose Pyrophosphorylase (UDPGP) Gene Family in Plants: Conserved Evolution Involved in Cell Death
Source: Front Plant Sci. 2021 Jun 10;12:681719. doi: 10.3389/fpls.2021.681719 (PMC8222925; doi:10.3389/fpls.2021.681719)
Supplement: Supplementary Table 3 — Orthogroups generated by McScanX. [file Table_3.XLSX]

## Sheet: Sheet1
Table S3 Orthogroups generated by McScanX.
OG1 (UGP-A)	OG2 (UAP)	OG3 (USP)	OG4 (UGP-B)	OG5 (UAP)	OG6 (UAP)	OG7 (UGP-A)
165987	167999	100378	150184	Glyma.08G121900.1.p	Mapoly0019s0078.1.p	Traes_1AL_5AD4E3431.1
30148.m001405	27704.m000151	29648.m001969	AT3G56040.1	Traes_1BL_5C7C06485.2	Mapoly0089s0037.1.p	Traes_7BL_AB31FFA84.2
30171.m000423	AT1G31070.2	AT5G52560.1	Brast08G090000.1.p	Traes_1DL_65E1F2414.2
AT3G03250.1	AT2G35020.1	Brast07G191100.1.p	Pahal.C02651.1
AT5G17310.2	Brast03G004500.1.p	Glyma.04G245100.1.p	Prupe.2G253500.1.p
Brast04G328700.1.p	Brast09G206600.1.p	Glyma.06G118100.1.p	Seita.3G210000.1.p
Brast05G208300.1.p	Glyma.05G132100.1.p	LOC_Os06g48760.1	Sobic.009G168600.2.p
Glyma.02G241100.1.p	Glyma.08G086700.1.p	Mapoly0020s0171.1.p	Solyc06g051080.2.1
Glyma.06G001900.1.p	LOC_Os04g52370.1	Pahal.D00032.1	Traes_1AL_246B50313.1
Glyma.13G152500.1.p	LOC_Os08g10600.1	Pp3c14_26160V3.1.p	Traes_1DL_25AE62890.1
Glyma.14G210700.1.p	Pahal.F01321.1	Pp3c7_22840V3.1.p	orange1.1g002690m
Glyma.18G044400.1.p	Pahal.G02305.1	Prupe.1G488700.1.p
Glyma.19G104700.1.p	Pp3c15_14250V3.1.p	Seita.3G168600.1.p
Glyma.U041600.1.p	Pp3c4_17200V3.1.p	Seita.4G242100.1.p
LOC_Os01g15910.1	Prupe.4G115400.1.p	Seita.7G313500.1.p
LOC_Os02g02560.1	Seita.6G026800.1.p	Sobic.010G251200.1.p
LOC_Os09g38030.1	Seita.7G235100.1.p	Solyc04g058070.2.1
Mapoly0072s0036.1.p	Sobic.006G213100.1.p	Traes_7AL_8CDD7A174.1
Pahal.A00016.1	Sobic.007G075500.1.p	Traes_7BL_4C45F5D62.1
Pahal.B03792.1	Solyc02g068530.2.1	Traes_7DL_6CCFD4346.1
Pp3c11_690V3.1.p	Traes_2AL_81025812B.1	evm_27.model.AmTr_v1.0_scaffold00202.7
Pp3c1_140V3.1.p	Traes_2BL_965768E2D.2	orange1.1g006297m
Pp3c23_20400V3.1.p	Traes_2DL_DAAE7AFAF.2
Prupe.2G107500.1.p	evm_27.model.AmTr_v1.0_scaffold00032.274
Prupe.3G015000.1.p	orange1.1g010950m
Seita.1G112800.1.p
Seita.2G301600.1.p
Sobic.002G291200.1.p
Sobic.004G013500.1.p
Solyc01g081520.2.1
Solyc05g054060.2.1
Solyc11g011960.1.1
Traes_5AL_E97939490.2
Traes_5BL_AEEB6621B.3
Traes_5DL_CFFABFAA6.2
Traes_6AS_3A8E07254.1
Traes_6BS_0AFE47E4B.1
evm_27.model.AmTr_v1.0_scaffold00044.42
orange1.1g006541m
orange1.1g012172m
